# Supplementary material
Source: HighWire-hosted journal article supplement (https://bmjopen.bmj.com/content/9/11/e032289)
Supplement: inline-supplementary-material-2 [file inline-supplementary-material-2.pdf]

**Table 1 : Definition of septic shock**

| <b>Disease</b>                                                                                       | <b>Definition</b>                                                                                                                                                                                                                                                                                                                                                                                                                                                                                                                                                                                                                                                                                                                                                                                                                                                                                                                                                                                                                                                                                                                                                                                                                                                                                                                                                                                                                                                                                                                                                                                                                                                                                                                                                                                                                                                                                                                                                                                                                                                                                                                                                                                                                                                                                                                                                                                                                                                                                                                                                                                                                                                                                                                                                                                                            |
|------------------------------------------------------------------------------------------------------|------------------------------------------------------------------------------------------------------------------------------------------------------------------------------------------------------------------------------------------------------------------------------------------------------------------------------------------------------------------------------------------------------------------------------------------------------------------------------------------------------------------------------------------------------------------------------------------------------------------------------------------------------------------------------------------------------------------------------------------------------------------------------------------------------------------------------------------------------------------------------------------------------------------------------------------------------------------------------------------------------------------------------------------------------------------------------------------------------------------------------------------------------------------------------------------------------------------------------------------------------------------------------------------------------------------------------------------------------------------------------------------------------------------------------------------------------------------------------------------------------------------------------------------------------------------------------------------------------------------------------------------------------------------------------------------------------------------------------------------------------------------------------------------------------------------------------------------------------------------------------------------------------------------------------------------------------------------------------------------------------------------------------------------------------------------------------------------------------------------------------------------------------------------------------------------------------------------------------------------------------------------------------------------------------------------------------------------------------------------------------------------------------------------------------------------------------------------------------------------------------------------------------------------------------------------------------------------------------------------------------------------------------------------------------------------------------------------------------------------------------------------------------------------------------------------------------|
| <b>Sepsis-3 definition for adult septic shock<sup>[1]</sup></b>                                      | <p><b>Septic shock</b> is defined as a sepsis denoted by an increase of 2 points or more in the Sequential Organ Failure Assessment (SOFA) score.</p> <p><b>Plus</b></p> <p>Persistent hypotension (despite adequate volume resuscitation) requiring vasopressors to maintain mean arterial blood pressure <math>\geq 65</math> mmHg,</p> <p><b>Plus</b></p> <p>Serum lactate <math>\geq 2</math> mmol/l</p>                                                                                                                                                                                                                                                                                                                                                                                                                                                                                                                                                                                                                                                                                                                                                                                                                                                                                                                                                                                                                                                                                                                                                                                                                                                                                                                                                                                                                                                                                                                                                                                                                                                                                                                                                                                                                                                                                                                                                                                                                                                                                                                                                                                                                                                                                                                                                                                                                 |
| <b>International pediatric sepsis consensus conference for pediatric septic shock<sup>[18]</sup></b> | <p><b>Septic shock</b> is defined as the presence of a systemic inflammatory response syndrome (SIRS), an infection and cardiovascular dysfunction as follows;</p> <p><b>SIRS</b></p> <p>The presence of at least two of the following four criteria, one of which must be abnormal temperature or leucocyte count</p> <ul style="list-style-type: none"> <li>-Core temperature above 38.5°C or less than 36°C</li> <li>-Tachycardia defined as a mean heart rate <math>&gt; 2SD</math> above normal for age in the absence of external stimulus, chronic drugs or painful stimuli; or otherwise unexplained persistent elevation over a 0.5- to 4-hr time period OR for children <math>&lt; 1</math> year old: bradycardia, defined as a mean heart rate <math>&lt; 10</math>th percentile for age in the absence of external vagal stimulus, <math>\beta</math>-blockers drugs, or congenital heart disease; or otherwise unexplained persistent depression per 0.5/h time period.</li> <li>-Mean respiratory rate <math>&gt; 2SD</math> above normal for age or mechanical ventilation for an acute process not related to underlying neuromuscular disease or the receipt of general anesthesia</li> <li>-Leucocytes count elevated or depressed for age (not secondary to chemotherapy-induced leucopenia) or <math>&gt; 10\%</math> immature neutrophils</li> </ul> <p><b>Infection</b></p> <p>A suspected or proven (by positive culture, tissue stain, or polymerase chain reaction test) infection caused by any pathogen OR a clinical syndrome associated with a high probability of infection. Evidence of infection includes positive findings on clinical examination, imaging, or laboratory test (e.g., white blood cells in a normally sterile body fluid, perforated viscus, chest radiograph consistent with pneumonia, petechial or purpuric rash, or purpura fulminans)</p> <p><b>Cardiovascular organ dysfunction</b></p> <p>Despite administration of isotonic intravenous fluid bolus <math>\geq 40</math>ml/kg in 1 h</p> <p>Decrease blood pressure <math>&lt; 5</math>th percentile for age or systolic blood pressure <math>&lt; 2SD</math> below normal for age OR Need for vasoactive drug to maintain blood pressure in normal range (dopamine <math>&gt; 5</math>ug/kg/min or dobutamine, epinephrine, or noradrenaline at any dose) OR two of the following</p> <ul style="list-style-type: none"> <li>-Unexplained metabolic acidosis: base deficit <math>&gt; 5.0</math> mEq/L</li> <li>-Increased arterial lactate <math>&gt; 2</math> times upper limit of normal</li> <li>-Oliguria: urine output <math>&lt; 0.5</math> ml/kg/h</li> <li>-Prolonged capillary refill: <math>&gt; 5</math> seconds</li> <li>-Core to peripheral temperature gap <math>&gt; 3^{\circ}C</math></li> </ul> |

<sup>1</sup>Singer M, Deutschman CS, Seymour CV, et al. The third International consensus definitions for sepsis and septic shock (Sepsis-3). JAMA 2016;315:801-10.

<sup>18</sup>Goldstein B, Giroir B, Randolph A, and the Members of the International Consensus Conference on Pediatric Sepsis. International pediatric sepsis consensus conference: Definitions for sepsis and organ dysfunction in pediatrics. Pediatr Crit Care Med 2005;6:2-8.
